# Supplementary material for: SpAD Biofunctionalized Cellulose Acetate Scaffolds Inhibit Staphylococcus aureus Adherence in a Coordinating Function with the von Willebrand A1 Domain (vWF A1)
Source: MDPI journal article supplement (doi:10.3390/jfb13010021), 2022-02-21
Supplement: s1 [file s1]

Article

# SpAD Biofunctionalized Cellulose Acetate Scaffolds Inhibit *Staphylococcus aureus* Adherence in a Coordinating Function with the von Willebrand A1 Domain (vWF A1)

Stefanos Pendas <sup>1,2</sup>, Antonis Asiminas<sup>3</sup>, Alexandros Katranidis<sup>4</sup>, Costas Tsiptsias <sup>5</sup>, Maria Pitou <sup>1</sup>, Georgios Papadopoulos <sup>6</sup> and Theodora Choli-Papadopoulos <sup>1,\*</sup>

- <sup>1</sup> Laboratory of Biochemistry, Department of Chemistry, Aristotle University of Thessaloniki, University Campus, 54124 Thessaloniki, Greece; spidy1927@yahoo.gr (S.P.); margeopit@chem.auth.gr (M.P.)
  - <sup>2</sup> General Hospital of Thessaloniki “St. Demetrios”, Eleni Zografou 2, 54634 Thessaloniki, Greece
  - <sup>3</sup> Division of Glial Disease and Therapeutics, Center for Translational Neuromedicine, University of Copenhagen, Nørre Alle 14, 24.3.9, 2200 Copenhagen N, Denmark; a.asiminas@sund.ku.dk
  - <sup>4</sup> Institute of Biological Information Processing IBI-6, Forschungszentrum Jülich (FZJ), 52425 Jülich, Germany; a.katranidis@fz-juelich.de
  - <sup>5</sup> Department of Chemical Engineering, Aristotle University of Thessaloniki, University Campus, 54124 Thessaloniki, Greece; ktsiots@gmail.com
  - <sup>6</sup> Department of Biochemistry and Biotechnology, University of Thessaly, Biopolis, 41500 Larissa, Greece; gepap@bio.uth.gr
- \* Correspondence: tcholi@chem.auth.gr

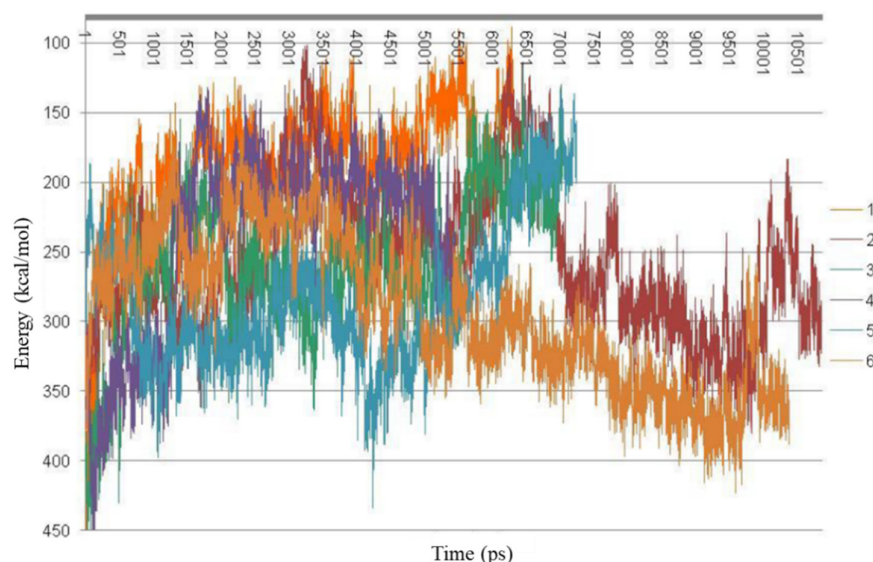

**Figure S1.** Comparison of binding energies for complexes 1-6. The low energy value for complex 6, which is also the most likely conformation for the interaction, is evident. The value of the final energy is very close to the energy provided by the zdock server (-370 kcal/mol).
